# Supplementary material
Source: Springer Nature journal article supplement (https://www.springermedizin.de/resource/supplementary/12889_2013_7520_MOESM2_ESM.pdf/9498378)
Supplement: MOESM2 [file 9498378]

| Program Day 1 – Training session 1 - Baseline  |    |    |    |    |    |    |    |    |    |                        |    |    |    |    |    |    |    |    |    |                   |    |    |    |    |    |    |    |    |    |                   |    |    |    |    |    |    |    |    |    |
|------------------------------------------------|----|----|----|----|----|----|----|----|----|------------------------|----|----|----|----|----|----|----|----|----|-------------------|----|----|----|----|----|----|----|----|----|-------------------|----|----|----|----|----|----|----|----|----|
| Coach 1                                        |    |    |    |    |    |    |    |    |    | Coach 2                |    |    |    |    |    |    |    |    |    | Coach 3           |    |    |    |    |    |    |    |    |    | Coach 4           |    |    |    |    |    |    |    |    |    |
| 1                                              | 2  | 3  | 4  | 5  | 6  | 7  | 8  | 9  | 10 | 11                     | 12 | 13 | 14 | 15 | 16 | 17 | 18 | 19 | 20 | 21                | 22 | 23 | 24 | 25 | 26 | 27 | 28 | 29 | 30 | 31                | 32 | 33 | 34 | 35 | 36 | 37 | 38 | 39 | 40 |
| Players                                        |    |    |    |    |    |    |    |    |    | Players                |    |    |    |    |    |    |    |    |    | Players           |    |    |    |    |    |    |    |    |    | Players           |    |    |    |    |    |    |    |    |    |
| Program Day 1 – Training session 2 - Baseline  |    |    |    |    |    |    |    |    |    |                        |    |    |    |    |    |    |    |    |    |                   |    |    |    |    |    |    |    |    |    |                   |    |    |    |    |    |    |    |    |    |
| Coach 1                                        |    |    |    |    |    |    |    |    |    | Coach 2                |    |    |    |    |    |    |    |    |    | Coach 3           |    |    |    |    |    |    |    |    |    | Coach 4           |    |    |    |    |    |    |    |    |    |
| 17                                             | 9  | 32 | 13 | 33 | 18 | 38 | 20 | 11 | 10 | 31                     | 3  | 4  | 35 | 37 | 1  | 28 | 14 | 8  | 12 | 36                | 19 | 22 | 6  | 15 | 16 | 34 | 29 | 25 | 7  | 21                | 5  | 39 | 40 | 24 | 2  | 27 | 23 | 30 | 26 |
| Players                                        |    |    |    |    |    |    |    |    |    | Players                |    |    |    |    |    |    |    |    |    | Players           |    |    |    |    |    |    |    |    |    | Players           |    |    |    |    |    |    |    |    |    |
| Program Day 2 – Training session 1             |    |    |    |    |    |    |    |    |    |                        |    |    |    |    |    |    |    |    |    |                   |    |    |    |    |    |    |    |    |    |                   |    |    |    |    |    |    |    |    |    |
| Coach 1 (intervention)                         |    |    |    |    |    |    |    |    |    | Coach 2 (intervention) |    |    |    |    |    |    |    |    |    | Coach 3 (control) |    |    |    |    |    |    |    |    |    | Coach 4 (control) |    |    |    |    |    |    |    |    |    |
| 16                                             | 5  | 40 | 37 | 26 | 35 | 19 | 11 | 27 | 15 | 13                     | 1  | 33 | 39 | 21 | 8  | 25 | 36 | 31 | 18 | 17                | 12 | 6  | 34 | 29 | 22 | 20 | 30 | 3  | 23 | 10                | 28 | 4  | 9  | 38 | 7  | 2  | 24 | 32 | 14 |
| Players                                        |    |    |    |    |    |    |    |    |    | Players                |    |    |    |    |    |    |    |    |    | Players           |    |    |    |    |    |    |    |    |    | Players           |    |    |    |    |    |    |    |    |    |
| Program Day 2 – Training session 2             |    |    |    |    |    |    |    |    |    |                        |    |    |    |    |    |    |    |    |    |                   |    |    |    |    |    |    |    |    |    |                   |    |    |    |    |    |    |    |    |    |
| Coach 1 (intervention)                         |    |    |    |    |    |    |    |    |    | Coach 2 (intervention) |    |    |    |    |    |    |    |    |    | Coach 3 (control) |    |    |    |    |    |    |    |    |    | Coach 4 (control) |    |    |    |    |    |    |    |    |    |
| 36                                             | 40 | 15 | 26 | 31 | 27 | 21 | 37 | 25 | 1  | 19                     | 16 | 13 | 8  | 11 | 39 | 33 | 18 | 35 | 5  | 23                | 22 | 29 | 3  | 20 | 4  | 12 | 28 | 32 | 30 | 17                | 9  | 38 | 7  | 34 | 10 | 14 | 2  | 24 | 6  |
| Players                                        |    |    |    |    |    |    |    |    |    | Players                |    |    |    |    |    |    |    |    |    | Players           |    |    |    |    |    |    |    |    |    | Players           |    |    |    |    |    |    |    |    |    |
| Program Day 3 – Training session 1             |    |    |    |    |    |    |    |    |    |                        |    |    |    |    |    |    |    |    |    |                   |    |    |    |    |    |    |    |    |    |                   |    |    |    |    |    |    |    |    |    |
| Coach 1 (intervention)                         |    |    |    |    |    |    |    |    |    | Coach 2 (intervention) |    |    |    |    |    |    |    |    |    | Coach 3 (control) |    |    |    |    |    |    |    |    |    | Coach 4 (control) |    |    |    |    |    |    |    |    |    |
| 21                                             | 36 | 18 | 8  | 33 | 31 | 37 | 26 | 13 | 15 | 35                     | 19 | 1  | 39 | 5  | 16 | 40 | 27 | 11 | 25 | 9                 | 14 | 34 | 2  | 17 | 23 | 7  | 12 | 28 | 4  | 20                | 6  | 38 | 10 | 32 | 22 | 24 | 3  | 29 | 30 |
| Players                                        |    |    |    |    |    |    |    |    |    | Players                |    |    |    |    |    |    |    |    |    | Players           |    |    |    |    |    |    |    |    |    | Players           |    |    |    |    |    |    |    |    |    |
| Program Day 3 – Training session 2             |    |    |    |    |    |    |    |    |    |                        |    |    |    |    |    |    |    |    |    |                   |    |    |    |    |    |    |    |    |    |                   |    |    |    |    |    |    |    |    |    |
| Coach 1 (intervention)                         |    |    |    |    |    |    |    |    |    | Coach 2 (intervention) |    |    |    |    |    |    |    |    |    | Coach 3 (control) |    |    |    |    |    |    |    |    |    | Coach 4 (control) |    |    |    |    |    |    |    |    |    |
| 33                                             | 21 | 26 | 16 | 1  | 27 | 37 | 25 | 5  | 31 | 36                     | 35 | 40 | 18 | 11 | 39 | 15 | 13 | 8  | 19 | 38                | 12 | 34 | 2  | 28 | 6  | 10 | 23 | 17 | 7  | 9                 | 29 | 22 | 4  | 14 | 32 | 3  | 24 | 30 | 20 |
| Players                                        |    |    |    |    |    |    |    |    |    | Players                |    |    |    |    |    |    |    |    |    | Players           |    |    |    |    |    |    |    |    |    | Players           |    |    |    |    |    |    |    |    |    |
| Program Day 4 – Training session 1             |    |    |    |    |    |    |    |    |    |                        |    |    |    |    |    |    |    |    |    |                   |    |    |    |    |    |    |    |    |    |                   |    |    |    |    |    |    |    |    |    |
| Coach 1 (intervention)                         |    |    |    |    |    |    |    |    |    | Coach 2 (intervention) |    |    |    |    |    |    |    |    |    | Coach 3 (control) |    |    |    |    |    |    |    |    |    | Coach 4 (control) |    |    |    |    |    |    |    |    |    |
| 33                                             | 40 | 18 | 31 | 37 | 8  | 15 | 21 | 26 | 11 | 27                     | 19 | 35 | 39 | 36 | 13 | 1  | 25 | 5  | 16 | 4                 | 10 | 30 | 3  | 7  | 12 | 34 | 6  | 22 | 23 | 28                | 9  | 2  | 32 | 24 | 14 | 17 | 20 | 38 | 29 |
| Players                                        |    |    |    |    |    |    |    |    |    | Players                |    |    |    |    |    |    |    |    |    | Players           |    |    |    |    |    |    |    |    |    | Players           |    |    |    |    |    |    |    |    |    |
| Program Day 4 – Training session 2             |    |    |    |    |    |    |    |    |    |                        |    |    |    |    |    |    |    |    |    |                   |    |    |    |    |    |    |    |    |    |                   |    |    |    |    |    |    |    |    |    |
| Coach 1 (intervention)                         |    |    |    |    |    |    |    |    |    | Coach 2 (intervention) |    |    |    |    |    |    |    |    |    | Coach 3 (control) |    |    |    |    |    |    |    |    |    | Coach 4 (control) |    |    |    |    |    |    |    |    |    |
| 15                                             | 13 | 39 | 16 | 18 | 1  | 8  | 33 | 35 | 11 | 21                     | 40 | 27 | 19 | 37 | 25 | 36 | 26 | 5  | 31 | 17                | 30 | 7  | 20 | 3  | 29 | 38 | 34 | 6  | 32 | 23                | 12 | 14 | 22 | 9  | 10 | 4  | 28 | 2  | 24 |
| Players                                        |    |    |    |    |    |    |    |    |    | Players                |    |    |    |    |    |    |    |    |    | Players           |    |    |    |    |    |    |    |    |    | Players           |    |    |    |    |    |    |    |    |    |
| Program Day 5 – Training session 1 – Follow up |    |    |    |    |    |    |    |    |    |                        |    |    |    |    |    |    |    |    |    |                   |    |    |    |    |    |    |    |    |    |                   |    |    |    |    |    |    |    |    |    |

|                                                       |                              |                            |                              |
|-------------------------------------------------------|------------------------------|----------------------------|------------------------------|
| Coach 1 (intervention)                                | Coach 2 (intervention)       | Coach 3 (control)          | Coach 4 (control)            |
| 16 18 35 8 40 36 15 25 33 27                          | 39 1 21 19 11 26 5 13 37 31  | 10 28 9 30 3 12 34 4 29 17 | 2 38 32 7 14 23 20 6 22 24   |
| Players                                               | Players                      | Players                    | Players                      |
| <b>Program Day 5 – Training session 2 – Follow up</b> |                              |                            |                              |
| Coach 1 (intervention)                                | Coach 2 (intervention)       | Coach 3 (control)          | Coach 4 (control)            |
| 25 27 11 39 1 16 26 40 5 37                           | 15 31 36 13 19 33 35 18 8 21 | 10 34 2 6 9 24 30 23 7 4   | 38 12 14 22 17 29 28 3 20 32 |
| Players                                               | Players                      | Players                    | Players                      |

Figure 2 Illustrates the randomisation procedure for each training session for one site. Note: numbers represent player identification number.
